# Supplementary material for: Epithelial plasticity can generate multi-lineage phenotypes in human and murine bladder cancers
Source: PubMed Central journal article supplement (PMC7242345; doi:10.1038/s41467-020-16162-3), 2020-05-21
Supplement: 41467_2020_16162_MOESM3_ESM.pdf [file 41467_2020_16162_MOESM3_ESM.pdf]

## Description of Additional Supplementary Files

File Name: Supplemental Data 1

Description: Top up and down genes from scRNA seq. data for mouse bladder tumors.

File Name: Supplemental Data 2

Description: Top up and down genes from scRNA seq. data for human bladder tumor 357.

File Name: Supplemental Data 3

Description: Top up and down genes from scRNA seq. data for human bladder tumor 359.
